# Supplementary material for: Visualization of microscale particle focusing in diluted and whole blood using particle trajectory analysis
Source: Royal Society of Chemistry journal article supplement (doi:10.1039/c2lc21100a), 2012-01-01
Supplement: c2lc21100a.pdf [file c2lc21100a.pdf]

Supplementary text for:

**Visualization of microscale particle focusing in diluted and whole blood using particle trajectory analysis**

Eugene J. Lim, Thomas J. Ober, Jon F. Edd, Gareth H. McKinley and Mehmet Toner

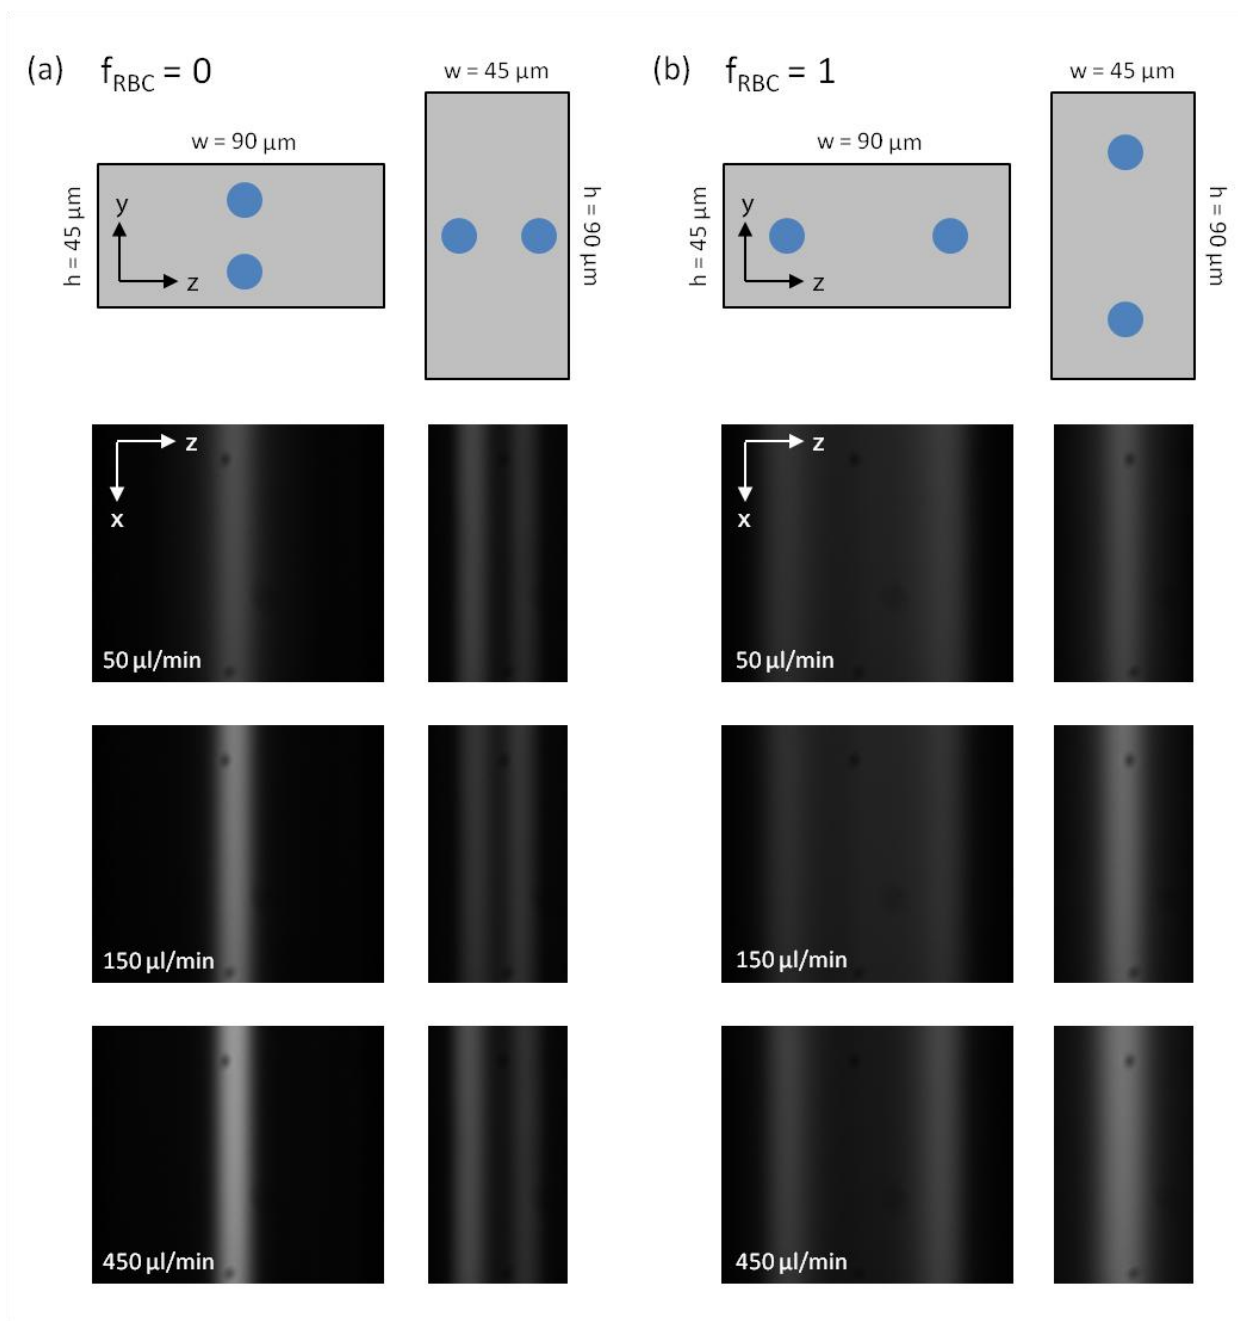

**Fig S1** Using long-exposure fluorescence (streak) imaging to verify PTA-observed PC-3 cell focusing behavior. Straight rectangular channels with opposite aspect ratios ( $H/W = 0.5$  and  $2$ ) were used to generate orthogonal imaging perspectives of PC-3 focusing behavior at 50, 150, and 450  $\mu\text{l}/\text{min}$  for: (a)  $f_{RBC} = 0$ , and (b)  $f_{RBC} = 1$ . PC-3 cell focusing behavior is symmetric across the center of the channel long face and not the result of particle settling or imaging artifacts.

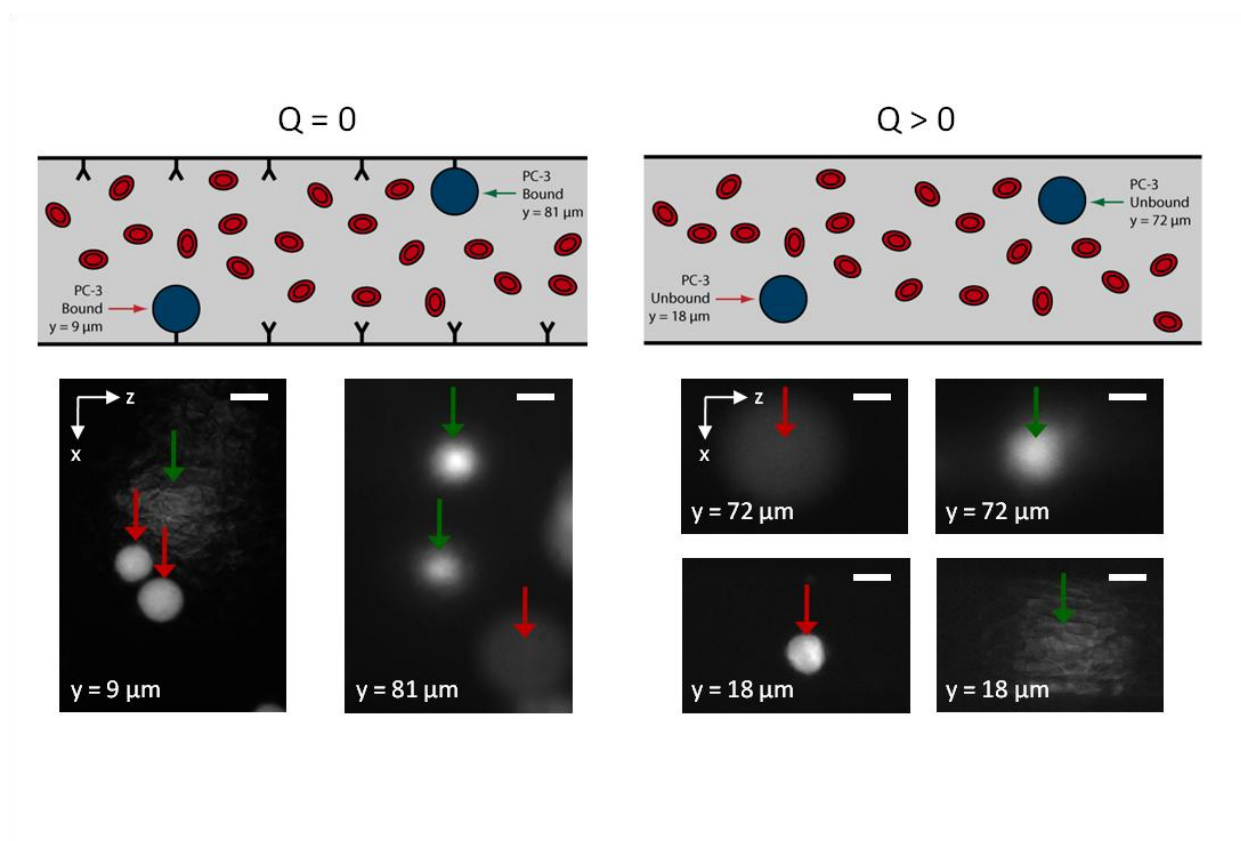

**Fig. S2** Identifying PC-3 cells re-suspended in whole blood ( $f_{RBC} = 1$ ,  $HCT = 45\%$ ). (a) A straight rectangular channel with 2:1 aspect ratio was functionalized with anti-EpCAM antibody, which binds to EpCAM surface markers found on PC-3 cells. After PC-3 cells were captured in the channel, images were taken near the channel floor ( $y = 9 \mu\text{m}$ ) to visualize PC-3 cells attached to the channel floor (red arrow) and the channel ceiling (green arrow). Images were also taken near the channel ceiling ( $y = 81 \mu\text{m}$ ) to visualize PC-3 cells attached to the channel floor (red arrow) and the channel ceiling (green arrow). (b) In an unfunctionalized channel, images were taken at  $y = 18 \mu\text{m}$  to visualize PC-3 cells flowing near the channel floor (red arrow) and the channel ceiling (green arrow). Images were also taken at  $y = 72 \mu\text{m}$  to visualize PC-3 cells flowing near the channel floor (red arrow) and the channel ceiling (green arrow).
